# Supplementary material for: Prevalence of rheumatoid arthritis in low– and middle–income countries: A systematic review and analysis
Source: PubMed Central journal article supplement (PMC4416333; doi:10.7189/jogh.05.010409), 2015-06
Supplement: jogh-05-010409-s001.pdf [file jogh-05-010409-s001.pdf]

## **Online Supplementary Document**

**Rudan, Sidhu et al. Urbanisation and prevalence of rheumatoid arthritis in low and middle income countries: A systematic review and analysis**

**J Glob Health 2015;5:010409**

### **CONTENTS**

1. Rheumatoid arthritis prevalence in low and middle income countries (LMIC)
2. Estimation of global RA prevalence based on meta-analysis
3. Estimation of regional RA prevalence based on means and medians
4. Estimation of regional RA prevalence based on meta-analysis
5. Association between mean age of the sample and RA prevalence
6. Association between gender and RA prevalence
7. Global RA prevalence for urban / rural environment
8. The full information extracted from the identified studies and used in a systematic analyses

# 1. Rheumatoid arthritis prevalence in low and middle-income countries (LMIC)

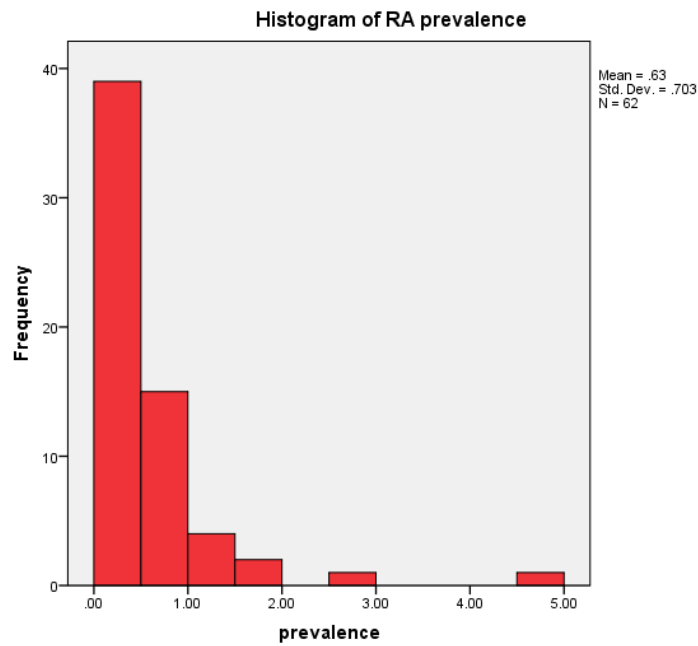

The RA prevalence is not normally distributed ( $p=0.002$ ).

## 1.1. One-Sample Kolmogorov-Smirnov Test

|                                  |                | prevalence |
|----------------------------------|----------------|------------|
| N                                |                | 62         |
| Normal Parameters <sup>a,b</sup> | Mean           | .6289      |
|                                  | Std. Deviation | .70348     |
|                                  | Absolute       | .233       |
| Most Extreme Differences         | Positive       | .233       |
|                                  | Negative       | -.210      |
| Kolmogorov-Smirnov Z             |                | 1.831      |
| Asymp. Sig. (2-tailed)           |                | .002       |

a. Test distribution is Normal.

b. Calculated from data.

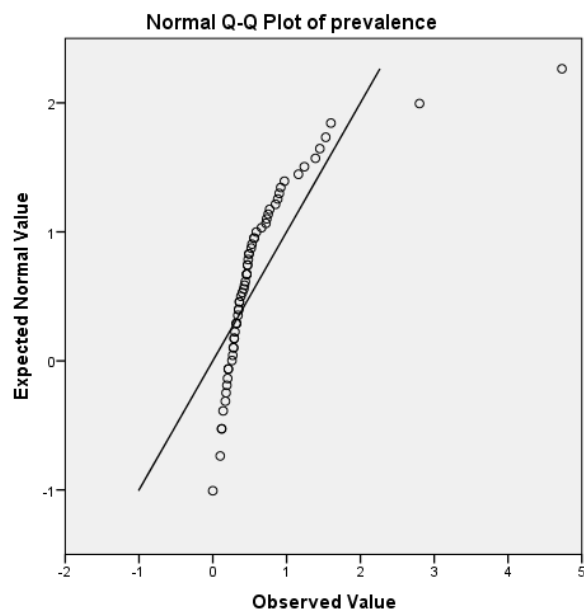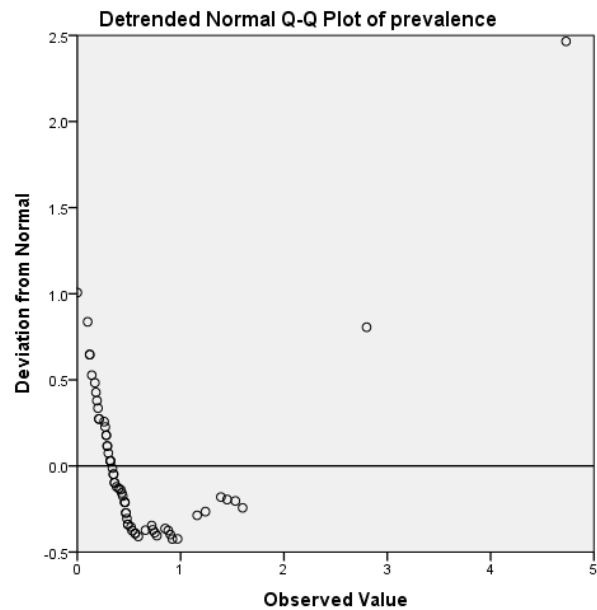

## 2. Estimation of global RA prevalence based on meta-analysis

The meta-analysis estimate of the global RA prevalence is 0.532 with 95% CI (0.452, 0.612) (DerSimonian-Laird method). Data are highly heterogeneous ( $I^2 = 96\%$ ). The meta-analysis results are displayed graphically with a forest plot (main text, **Figure 2**, and below).

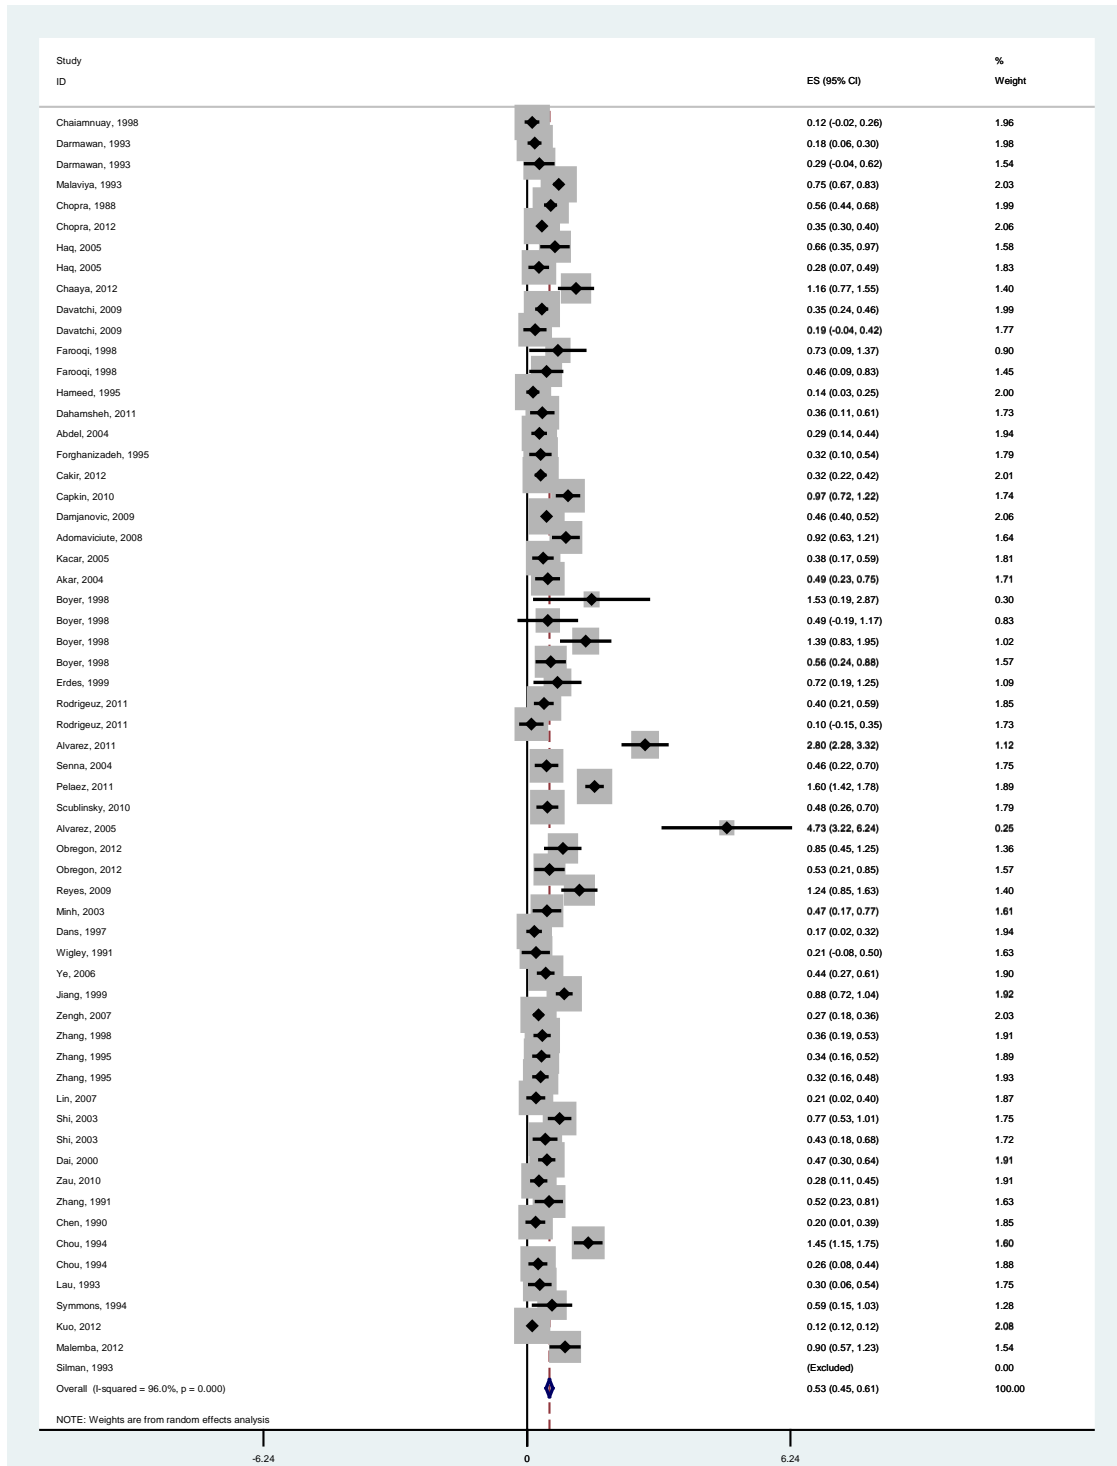

Heterogeneity chi-squared = 1489.80 (d.f. = 59) p = 0.000  
 I-squared (variation in ES attributable to heterogeneity) = 96.0%  
 Estimate of between-study variance Tau-squared = 0.0804

Test of ES=0 : z= 13.01 p = 0.000

### 3. Estimation of regional RA prevalence based on means and medians

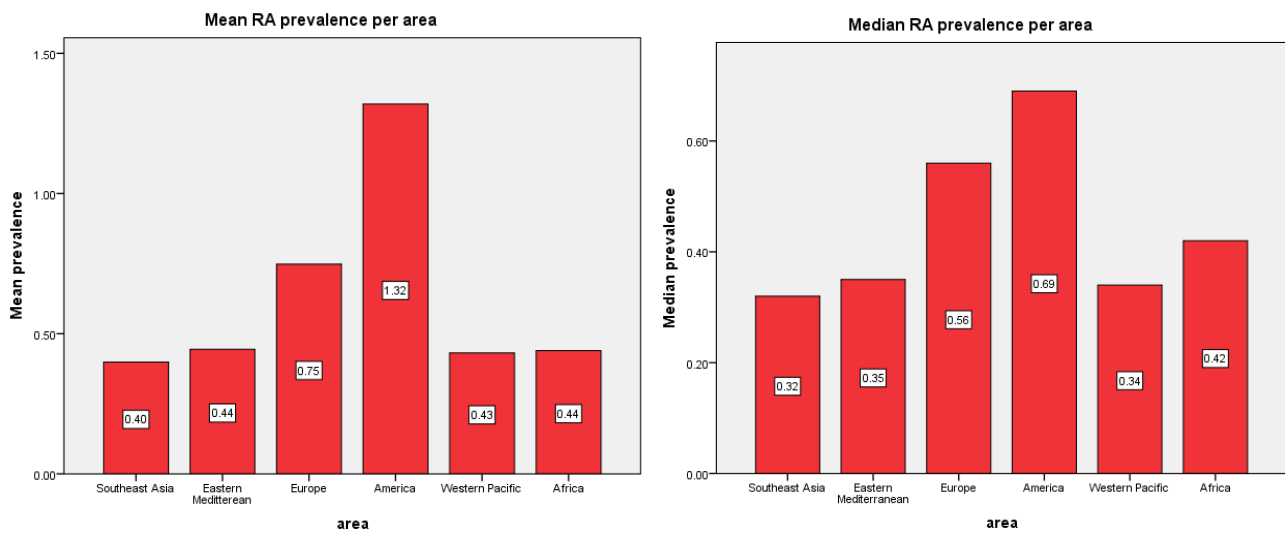

#### 3.1. Kruskal-Wallis test

The Kruskal–Wallis one-way analysis of variance by ranks examines whether samples originate from the same distribution. Since the significance of the test is  $p=0.029$ , at least one of the samples is statistically different from the others.

| Ranks      |                       |    |           |
|------------|-----------------------|----|-----------|
|            | area                  | N  | Mean Rank |
| prevalence | Southeast Asia        | 8  | 25.06     |
|            | Eastern Mediterranean | 9  | 25.94     |
|            | Europe                | 11 | 42.59     |
|            | America               | 10 | 43.00     |
|            | Western Pacific       | 21 | 25.64     |
|            | Africa                | 3  | 27.33     |
|            | Total                 | 62 |           |

| Test Statistics <sup>a,b</sup> |            |
|--------------------------------|------------|
|                                | prevalence |
| Chi-Square                     | 12.471     |
| df                             | 5          |
| Asymp. Sig.                    | .029       |

a. Kruskal Wallis Test

b. Grouping Variable: area

Since the RA prevalence is not normally distributed, we performed non-parametric Mann-Whitney U test to test the null hypothesis that the populations (considering pairs of areas) are the same. The regional RA prevalence rates that differed significantly were Southeast Asia - Europe ( $p=0.045$ ),

Eastern Mediterranean – Europe (p=0.031), Eastern Mediterranean – America (p=0.035), Europe - Western Pacific (p=0.006) and America - Western Pacific (p= 0.017).

#### 4. Estimation of regional RA prevalence based on meta-analysis

The meta-analysis estimates of regional RA prevalence rates were 0.397 (95% CI: 0.230-0.565) for Southeast Asia, 0.368 (0.232-0.505) for Eastern Mediterranean, 0.619 (0.469-0.770) for Europe, 1.253 (0.644-1.863) for America, 0.415 (0.304-0.526) for Western Pacific, respectively. No results can be extracted for Africa due to the limited data. Data are heterogeneous at all cases ( $I^2$  varies from 74.2% to 97.3%).

##### 4.1. Meta-analysis results for region Southeast Asia (SEAR):

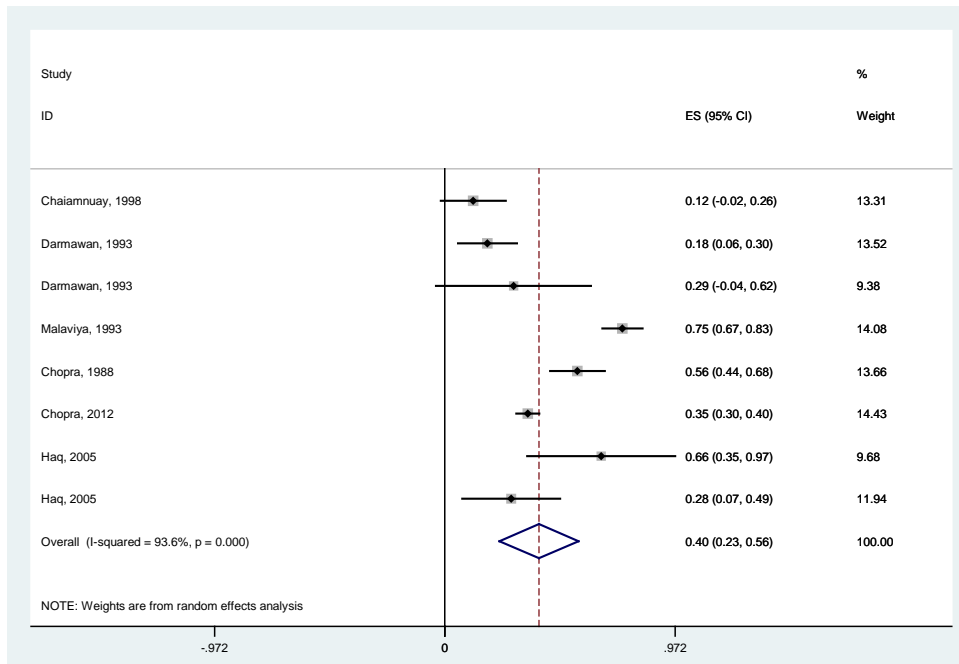

##### 4.2. Meta-analysis results for region Eastern Mediterranean (EMR):

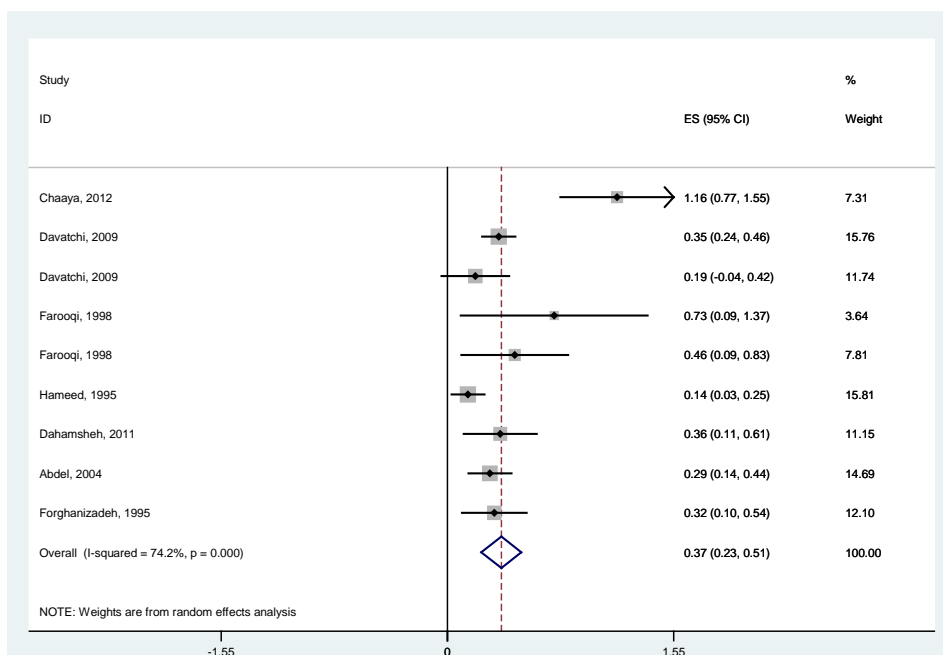

### 4.3. Meta-analysis results for region Europe:

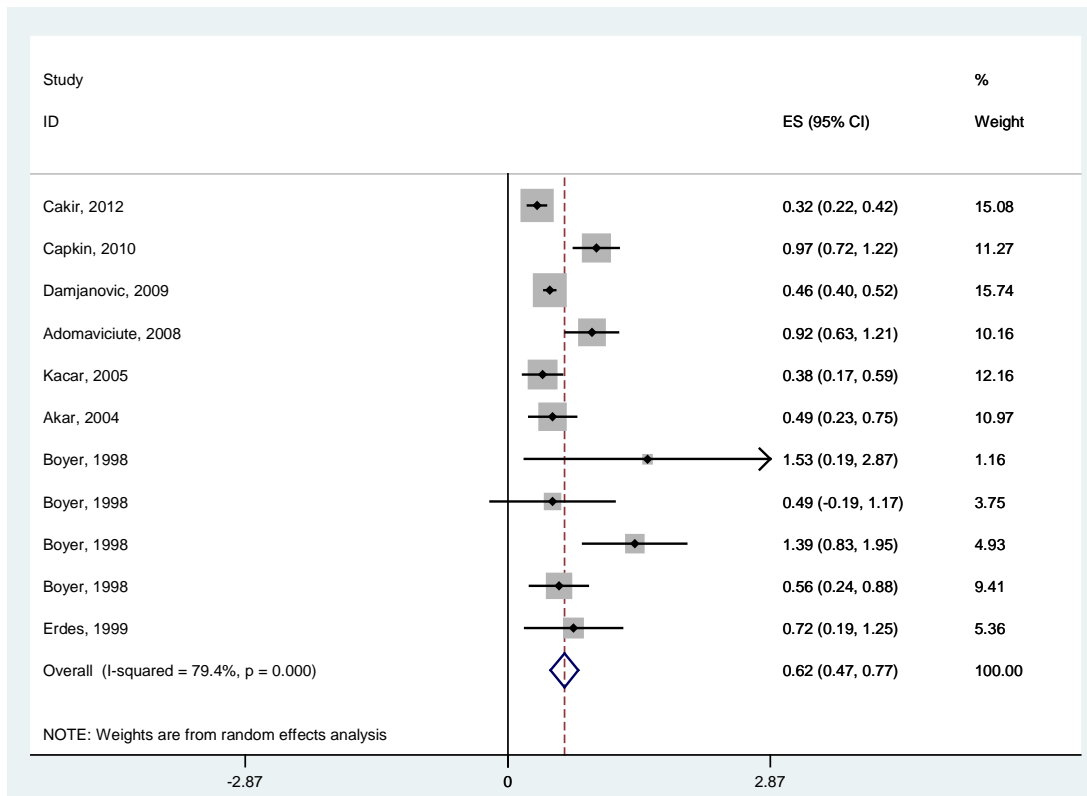

### 4.4. Meta-analysis results for region America:

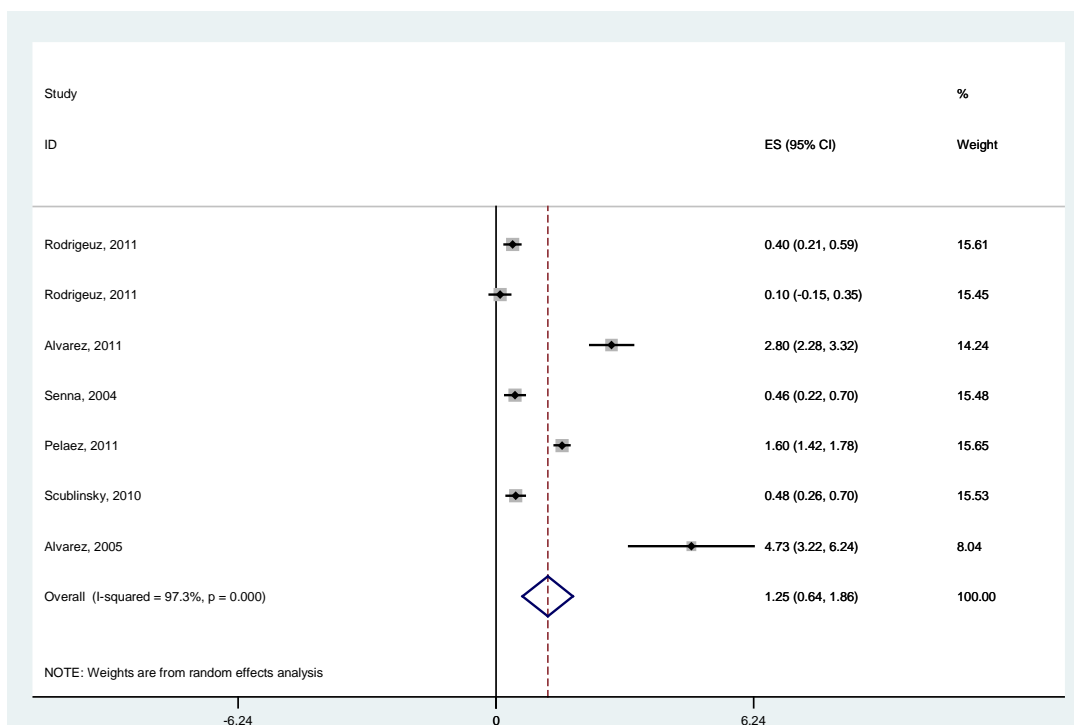

#### 4.5. Meta-analysis results for region Western Pacific:

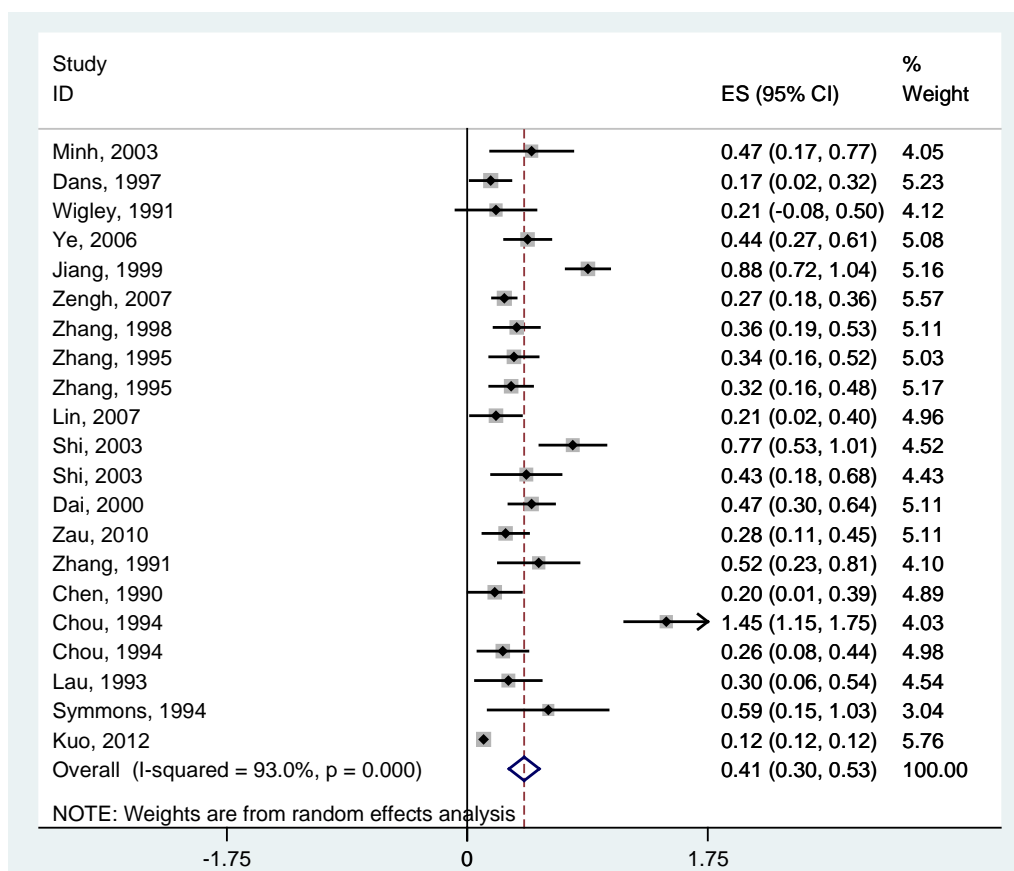

## 5. Association between mean age of the sample and RA prevalence

The global RA prevalence and the mean age are not associated based on linear correlation coefficients (Pearson, Kendall's tau, and Spearman) and also based on the generalized dependence measure mutual information ( $p=0.0599$ ;  $p>0.05$ ).

Coefficients of correlation

|          |                     | prevalence |
|----------|---------------------|------------|
| mean age | Pearson Correlation | .381       |
|          | Sig. (2-tailed)     | .060       |
|          | N                   | 25         |
|          | Kendall's tau       | 0.065      |
|          | Sig. (2-tailed)     | 0.655      |
|          | N                   | 25         |
|          | Spearman's rho      | 0.094      |
|          | Sig. (2-tailed)     | 0.654      |
|          | N                   | 25         |

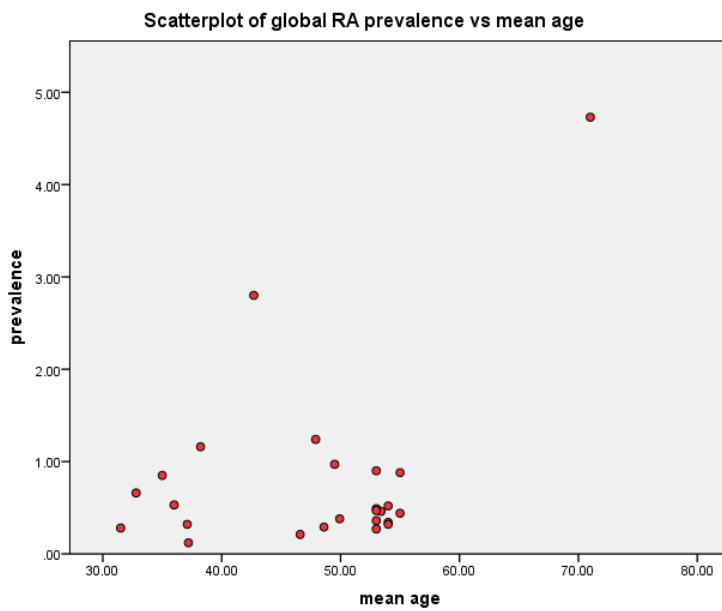



The optimal regression model for the two variables has been estimated after transforming the RA prevalence by taking its square root (sqrt). The variables sqrt (prevalence) and mean age were both normally distributed (p=0.186 and p=0.310, respectively, from the one-sample Kolmogorov Smirnov test).

**One-Sample Kolmogorov-Smirnov Test**

|                                  |                | mean age | sqrt(prev) |
|----------------------------------|----------------|----------|------------|
| N                                |                | 25       | 25         |
| Normal Parameters <sup>a,b</sup> | Mean           | 47.7776  | .8058      |
|                                  | Std. Deviation | 9.29083  | .39576     |
|                                  | Absolute       | .193     | .218       |
| Most Extreme Differences         | Positive       | .178     | .218       |
|                                  | Negative       | -.193    | -.155      |
| Kolmogorov-Smirnov Z             |                | .965     | 1.089      |
| Asymp. Sig. (2-tailed)           |                | .310     | .186       |

- a. Test distribution is Normal.
- b. Calculated from data.

The coefficient of determination of the corresponding quadratic model is  $R^2 = 43.7\%$ , meaning that 43.7% of the variance of the dependent variable, i.e. sqrt (prevalence), is explained by the mean age. The model is given by the equation:

$$\text{sqrt}(\text{prevalence}) = -0.001 (\text{mean age})^2 + 0.00002197 (\text{mean age})^3 + 1.668$$

**Model Summary**

| R    | R Square | Adjusted R Square | Std. Error of the Estimate |
|------|----------|-------------------|----------------------------|
| .661 | .437     | .386              | .310                       |

The independent variable is mean age.

**ANOVA**

|            | Sum of Squares | df | Mean Square | F     | Sig. |
|------------|----------------|----|-------------|-------|------|
| Regression | 1.644          | 2  | .822        | 8.552 | .002 |
| Residual   | 2.115          | 22 | .096        |       |      |
| Total      | 3.759          | 24 |             |       |      |

The independent variable is mean age.

**Coefficients**

|               | Unstandardised Coefficients |            | Standardised Coefficients | t      | Sig. |
|---------------|-----------------------------|------------|---------------------------|--------|------|
|               | B                           | Std. Error | Beta                      |        |      |
| mean age ** 2 | -.001                       | .001       | -3.368                    | -2.935 | .008 |
| mean age ** 3 | 2.197E-005                  | .000       | 3.801                     | 3.312  | .003 |
| (Constant)    | 1.668                       | .424       |                           | 3.930  | .001 |

## 6. Association between gender and RA prevalence

| Male RA prevalence |         |        |
|--------------------|---------|--------|
| N                  | Valid   | 34     |
|                    | Missing | 0      |
| Mean               |         | .2456  |
| Median             |         | .1500  |
| Std. Deviation     |         | .38030 |
| Minimum            |         | .00    |
| Maximum            |         | 2.17   |

| Female RA prevalence |         |         |
|----------------------|---------|---------|
| N                    | Valid   | 33      |
|                      | Missing | 0       |
| Mean                 |         | 1.0330  |
| Median               |         | .6700   |
| Std. Deviation       |         | 1.24794 |
| Minimum              |         | .00     |
| Maximum              |         | 7.14    |

### 6.1. Paired samples t-test

The paired samples t-test indicates that the male and female RA prevalence differ significantly ( $p < 0.0001$ ).

|                     | Paired Differences |                |                 |                                           |         | t      | df | Sig.<br>(2-tailed) |
|---------------------|--------------------|----------------|-----------------|-------------------------------------------|---------|--------|----|--------------------|
|                     | Mean               | Std. Deviation | Std. Error Mean | 95% Confidence Interval of the Difference |         |        |    |                    |
|                     |                    |                |                 | Lower                                     | Upper   |        |    |                    |
| male – female prev. | -.78182            | .93556         | .16286          | -1.11355                                  | -.45008 | -4.801 | 32 | .000               |

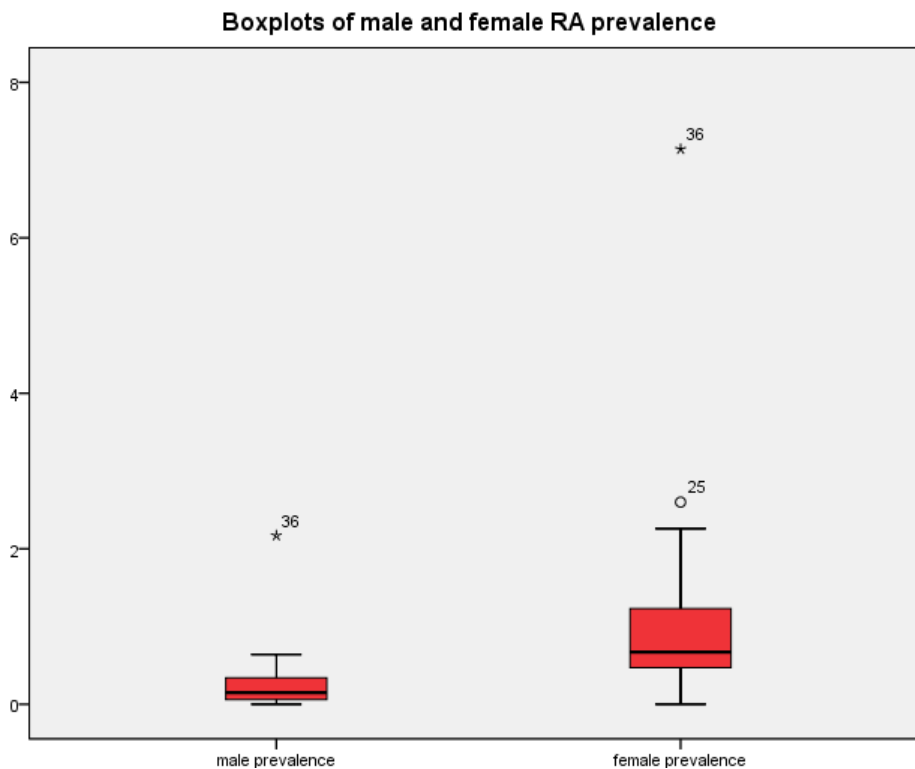

## 6.2. Meta-analysis of RA prevalence in men

The meta-analysis estimate of the global RA prevalence for men is 0.156 (95% CI: 0.111-0.200) and for women 0.747 (95% CI: 0.598-0.897). Data seem to be moderately heterogeneous for men ( $I^2 = 49.6\%$ ), but substantially heterogeneous for women ( $I^2 = 83.7\%$ ).

## 6.3. Prevalence in men and women by region

| area                  |                | Male prevalence | Female prevalence |
|-----------------------|----------------|-----------------|-------------------|
| Southeast Asia        | N              | 4               | 3                 |
|                       | Mean           | .0525           | 0.65              |
|                       | Median         | .0300           | 0.55              |
|                       | Std. Deviation | .07089          | 0.47791           |
|                       | Range          | .15             | 0.94              |
| Eastern Mediterranean | N              | 6               | 6                 |
|                       | Mean           | .2000           | 0.4433            |
|                       | Median         | .1700           | 0.43              |
|                       | Std. Deviation | .09960          | 0.22888           |
|                       | Range          | .24             | 0.67              |
| Europe                | N              | 9               | 9                 |
|                       | Mean           | .2267           | 1.2267            |
|                       | Median         | .1500           | 1.0400            |
|                       | Std. Deviation | .24316          | 0.78102           |
|                       | Range          | .64             | 2.20              |
| America               | N              | 4               | 4                 |
|                       | Mean           | .7850           | 2.7675            |
|                       | Median         | .4400           | 1.6300            |
|                       | Std. Deviation | .93853          | 2.95083           |
|                       | Range          | 2.08            | 6.47              |
| Western Pacific       | N              | 9               | 9                 |
|                       | Mean           | .1567           | 0.6611            |
|                       | Median         | .1500           | 0.5900            |
|                       | Std. Deviation | .12329          | 0.30726           |
|                       | Range          | .40             | 1.06              |
| Africa                | N              | 2               | 2                 |
|                       | Mean           | .1750           | 0.7100            |
|                       | Median         | .1750           | 0.7100            |
|                       | Std. Deviation | .24749          | 1.00409           |
|                       | Range          | .35             | 1.42              |

Boxplots of regional male RA prevalence

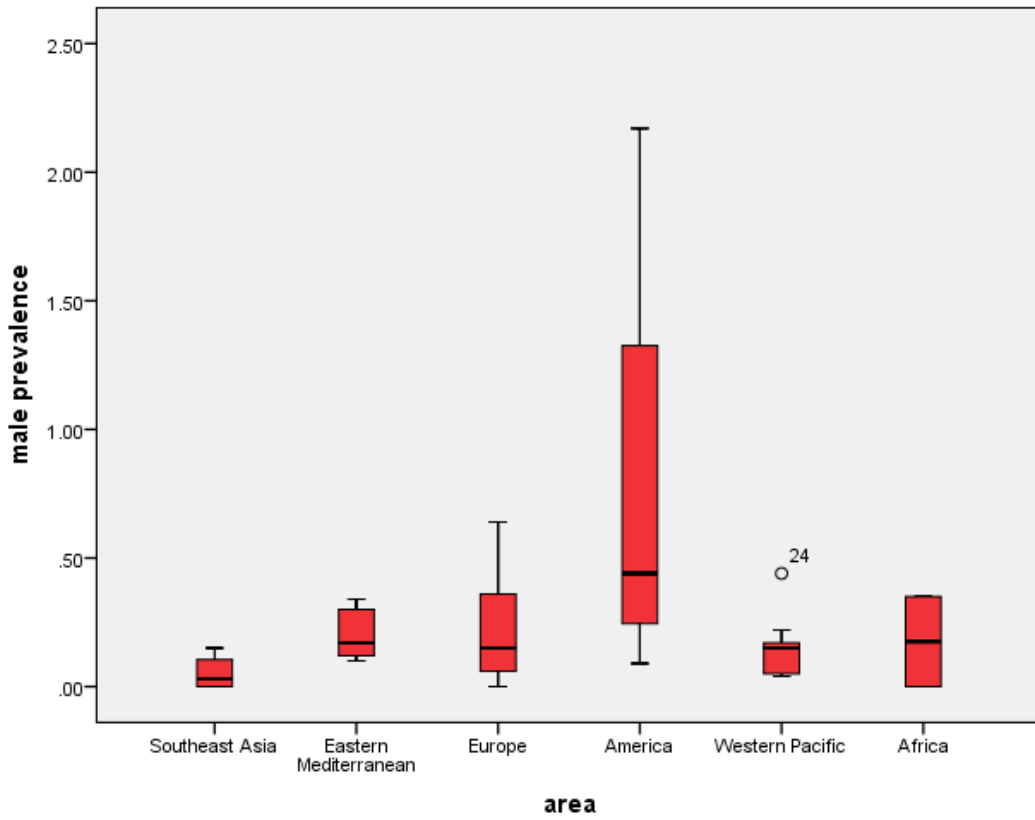

Boxplots of regional female RA prevalence

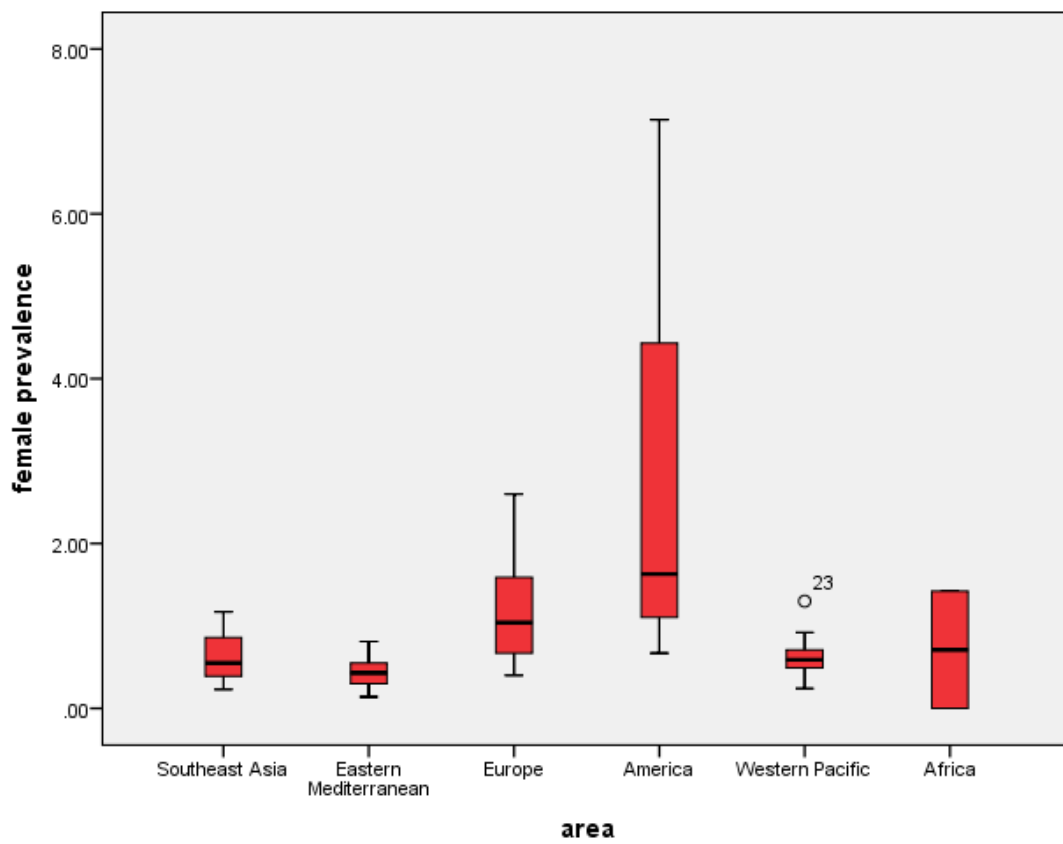

6.4. A summary of meta-analyses (where a sufficient amount of information was available) to determine prevalence by gender and WHO region

|                              | <b>Regional RA prevalence</b> |                         | <b>I<sup>2</sup></b> |              |
|------------------------------|-------------------------------|-------------------------|----------------------|--------------|
|                              | <b>Men</b>                    | <b>Women</b>            | <b>Men</b>           | <b>Women</b> |
| <b>Southeast Asia</b>        | -                             | 0.590<br>(0.105, 1.075) | -                    | 76.8%        |
| <b>Eastern Mediterranean</b> | 0.134<br>(0.073, 0.196)       | 0.396<br>(0.215, 0.577) | 0%                   | 64.5%        |
| <b>Europe</b>                | 0.163<br>(0.070, 0.256)       | 1.025<br>(0.661, 1.388) | 37.5%                | 81%          |
| <b>America</b>               | 0.494<br>(-0.090, 1.079)      | 2.413<br>(0.776, 4.049) | 80.4%                | 93.6%        |
| <b>Western Pacific</b>       | 0.140<br>(0.067, 0.214)       | 0.646<br>(0.434, 0.858) | 67.7%                | 80.1%        |
| <b>Africa</b>                | -                             | -                       | -                    | -            |

## 7. Global RA prevalence for urban / rural environment

Environment

|       |       | Frequency | Percent |
|-------|-------|-----------|---------|
| Valid | Urban | 25        | 52.1    |
|       | Rural | 23        | 47.9    |
|       | Total | 48        | 100.0   |

### Descriptive statistics

| environment         |                                  | Statistic                        |             |       |
|---------------------|----------------------------------|----------------------------------|-------------|-------|
| prevalence          | Mean                             | .5700                            |             |       |
|                     | 95% Confidence Interval for Mean | Lower Bound                      | .4105       |       |
|                     |                                  | Upper Bound                      | .7295       |       |
|                     | urban                            | Median                           | .4700       |       |
|                     |                                  | Std. Deviation                   | .38634      |       |
|                     |                                  | Minimum                          | .14         |       |
|                     |                                  | Maximum                          | 1.60        |       |
|                     |                                  | Interquartile Range              | .39         |       |
|                     | rural                            | Mean                             | .4874       |       |
|                     |                                  | 95% Confidence Interval for Mean | Lower Bound | .3207 |
|                     |                                  |                                  | Upper Bound | .6541 |
|                     |                                  | Median                           | .3600       |       |
|                     |                                  | Std. Deviation                   | .38557      |       |
|                     |                                  | Minimum                          | .00         |       |
| Maximum             |                                  | 1.53                             |             |       |
| Interquartile Range |                                  | .51                              |             |       |

Boxplots of RA prevalence per environment

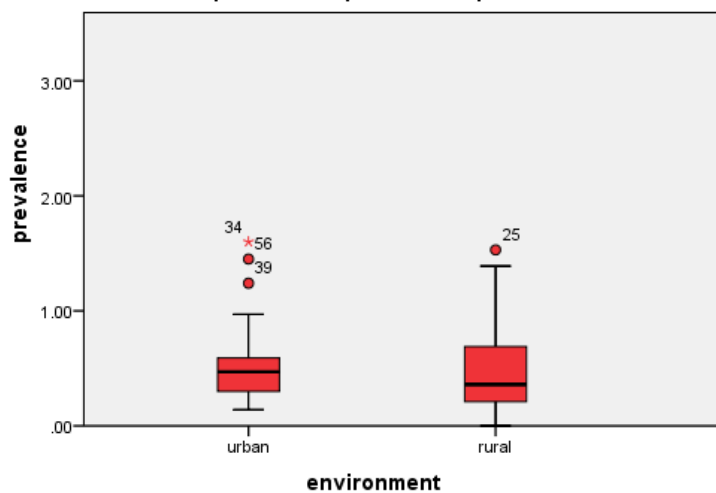

### 7.1. Mann-Whitney U test

Since the RA prevalence is not normally distributed, we performed the non-parametric Mann-Whitney U test to test the null hypothesis that the two populations are the same. The significance of the test is  $p=0.353$  ( $p>0.05$ ), indicating that the prevalence in the urban and rural settings do not differ significantly.

| Environment      | N  | Mean Rank | Sum of Ranks |
|------------------|----|-----------|--------------|
| Urban            | 25 | 26.30     | 657.50       |
| Prevalence Rural | 23 | 22.54     | 518.50       |
| Total            | 48 |           |              |

|                        | prevalence |
|------------------------|------------|
| Mann-Whitney U         | 242.500    |
| Wilcoxon W             | 518.500    |
| Z                      | -.929      |
| Asymp. Sig. (2-tailed) | .353       |

a. Grouping Variable: environment

### 7.2. Regional RA prevalence for urban / rural environment

| environment           | urban | rural |
|-----------------------|-------|-------|
| area                  | N     | N     |
| Southeast Asia        | 3     | 4     |
| Eastern Mediterranean | 3     | 3     |
| Europe                | 4     | 5     |
| prevalence America    | 6     | 2     |
| Western Pacific       | 9     | 8     |
| Africa                | 0     | 1     |

**Descriptive statistics**

|            |                       | environment    | urban     | rural     |
|------------|-----------------------|----------------|-----------|-----------|
| area       |                       |                | Statistic | Statistic |
| prevalence | Southeast Asia        | Mean           | .38       | 0.43      |
|            |                       | Median         | .29       | 0.42      |
|            |                       | Std. Deviation | .16       | 0.32      |
|            |                       | Range          | .28       | 0.63      |
|            | Eastern Mediterranean | Mean           | .32       | 0.40      |
|            |                       | Median         | .35       | 0.29      |
|            |                       | Std. Deviation | .16       | 0.29      |
|            |                       | Range          | .32       | 0.54      |
|            | Europe                | Mean           | .69       | 0.94      |
|            |                       | Median         | .71       | 0.72      |
|            |                       | Std. Deviation | .30       | 0.49      |
|            |                       | Range          | .59       | 1.04      |
|            | America               | Mean           | .79       | 0.48      |
|            |                       | Median         | .51       | 0.48      |
|            |                       | Std. Deviation | .51       | 0.53      |
|            |                       | Range          | 1.20      | 0.75      |
|            | Western Pacific       | Mean           | .52       | 0.33      |
|            |                       | Median         | .47       | 0.33      |
|            |                       | Std. Deviation | .40       | 0.11      |
|            |                       | Range          | 1.28      | 0.31      |

Note: For Africa, there are no observations of RA prevalence for urban environment. In the case of rural environment there was only one observation.



7.3. Mean RA prevalence by WHO region and urban/rural environment.

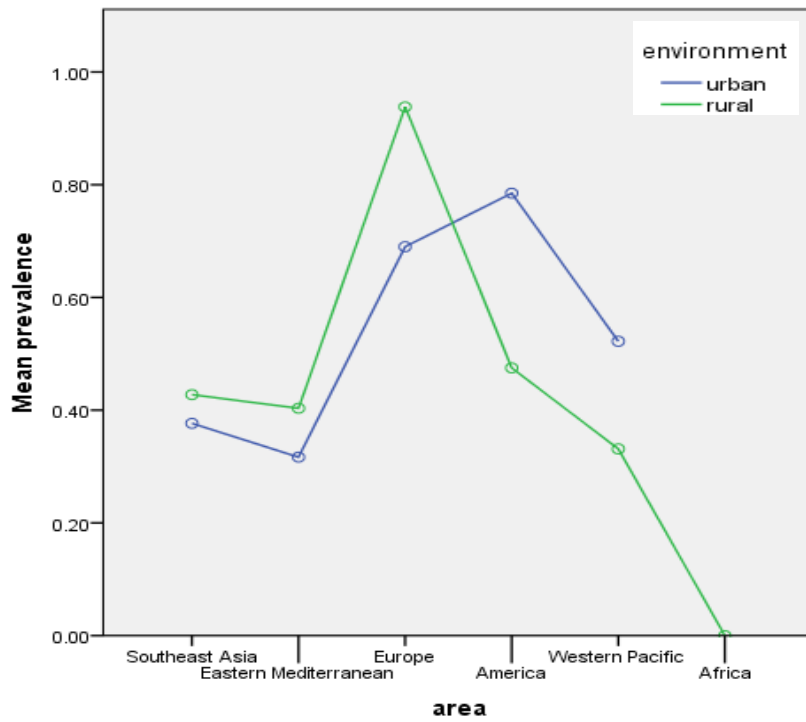

7.4. Median RA prevalence by WHO region and urban/rural environment.

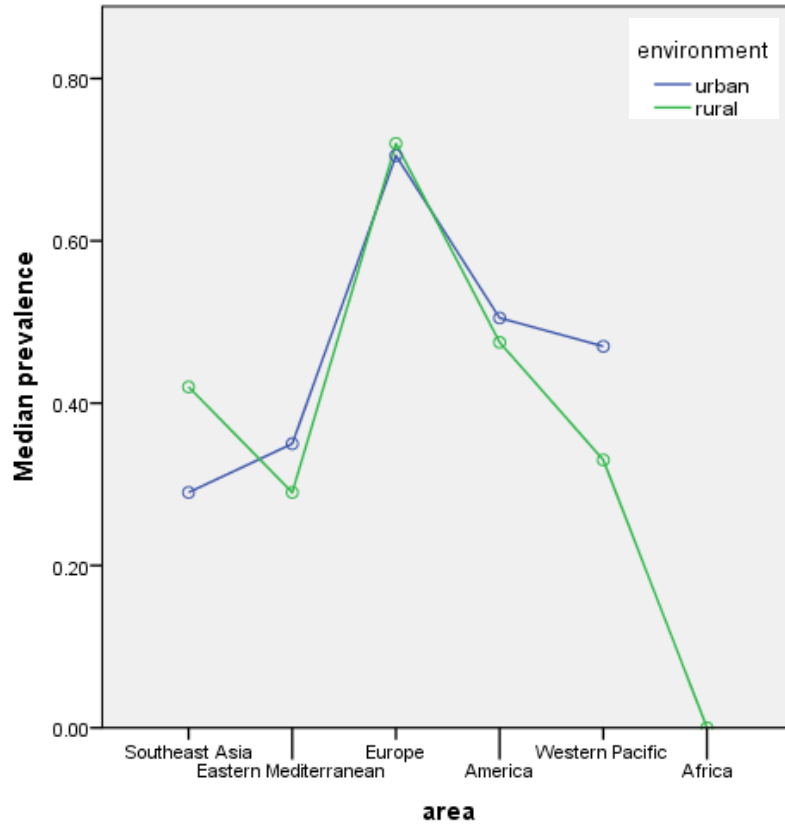

8. The full information extracted from the identified studies and used in a systematic analyses

| AUTHOR                       | COUNTRY/<br>REGION                             | URBAN/<br>RURAL | SAMPLE SIZE                            | DEFINI-<br>TION | CRUDE<br>PREVA-<br>LENCE | MEAN<br>AGE                                          | MALE<br>PREVALEN-<br>CE RATE | FEMALE<br>PREVALEN-<br>CE RATE | MALE/<br>FEMALE<br>RATIO |
|------------------------------|------------------------------------------------|-----------------|----------------------------------------|-----------------|--------------------------|------------------------------------------------------|------------------------------|--------------------------------|--------------------------|
| <b>SOUTHEAST ASIA</b>        |                                                |                 |                                        |                 |                          |                                                      |                              |                                |                          |
| Chaiamnuay P<br>et al (1998) | Thailand villages of<br>Nakornayok<br>Province | Rural           | 2463 (2455<br>respondents 99.7%)       | ACR             | n = 3; (0.12%<br>)       | 37.2                                                 | 1167; n = 0;<br>(0%)         | 1288; n = 3;<br>(0.23%)        |                          |
| Darmawan J<br>et al (1993)   | Indonesia, central<br>Java                     | Rural           | 4683 (95.2% response<br>rate)          | ARA             | n = 8;<br>(0.18%)        |                                                      | 2184                         | 2499                           | 1:3                      |
|                              |                                                | Urban           | 1071 (97.1% response<br>rate)          |                 | n = 3;<br>(0.29%)        |                                                      | 481                          | 590                            | 1:2                      |
| Malaviya AN<br>et al (1993)  | India, 5 villages in<br>Haryana                | Rural           | 44551; respondents =<br>39826          | ARA 1987        | n = 299;<br>(0.75%)      | Maximum<br>prevalence<br>in age<br>group of<br>25-29 | 29 cases                     | 270 cases                      | 1:9.3                    |
| Chopra A et a<br>l(1988)     | India                                          | Urban           | 110 adults with<br>polyarthritis 16000 | ARA             | n= 89;<br>(0.56%)        | 90% aged<br>25-45                                    | 0.06%                        |                                |                          |

|                            |                                                                                                                                                                  |               |                                       |     |                    |                    |                         |                         |        |
|----------------------------|------------------------------------------------------------------------------------------------------------------------------------------------------------------|---------------|---------------------------------------|-----|--------------------|--------------------|-------------------------|-------------------------|--------|
| Chopra A et al (2012)      | India 12 sites<br>Jammu, Delhi,<br>Guwahati, Bikaner,<br>Manipur, Kolkata,<br>Pune, Hyderabad,<br>Ralegaon Sidhi,<br>Calicut, Chennai,<br>Trivandrum,<br>Bhigwan | Urban & Rural | 56,541                                | ACR | n =198;<br>(0.38%) |                    |                         |                         |        |
| Haq SA et al (2005)        | Bangladesh,<br>Bhargaon union                                                                                                                                    | Rural         | 2635; 98.7% response<br>rate (n=2586) | ACR | 0.66%              | 32.8+/-<br>15.6    | 1295; n = 2;<br>(0.15%) | 1273 n = 15;<br>(1.17%) | 1:7.63 |
|                            | Bangladesh,<br>Mohammadpur                                                                                                                                       | Urban         | 2579; respondents<br>=2509            |     | 0.28%              | 31.5. +/-<br>13.5  | 1247; n = 0; (<br>0%)   | 1262; n = 7;<br>(0.55%) |        |
| <b>EASTERN MEDITTEREAN</b> |                                                                                                                                                                  |               |                                       |     |                    |                    |                         |                         |        |
| Chaaya M et al (2012)      | Lebanon, 26 districts                                                                                                                                            |               | 3530; 83% response<br>rate            | ACR | n = 34;<br>(1.16%) | 38.22 +/-<br>16.91 | 1804; (0.2%)            | 1726; (0.3% )           |        |

|                                  |                                       |       |                           |                          |                 |                   |                       |                       |         |
|----------------------------------|---------------------------------------|-------|---------------------------|--------------------------|-----------------|-------------------|-----------------------|-----------------------|---------|
| Davatchi F et al (2009)          | Iran, Tehrain (22 districts)          | Urban | 10,291                    | ARA                      | n = 35; (0.33%) |                   | 4878; n = 5; (0.09%)  | 5413; n= 30; (0.58%)  |         |
| Davatchi F et al (2009)          | Iran, 5 villages in Tuyserkhan County | Rural | 1565 86.7% response rate. |                          | 0.19%           |                   |                       |                       |         |
| Farooqi A & Gibson T (1998)      | Northern Pakistan village             | Rural | 683                       | ARA                      | n = 5; (0.73%)  |                   | 1005, n=3; (0.29%)    | 986, n = 8; (0.81%)   | 01:02.7 |
|                                  |                                       | Urban | 1314                      |                          | n = 6; (0.46%)  |                   |                       |                       |         |
| Hameed K , Gibson T et al (1995) | Pakistan, Karachi (Gulshan & Orangi)  | Urban | 4232                      | ARA 1958 criteria & 1987 | n = 6; (0.14%)  |                   | 2156, n =3; ( 0.14%)  | 2076 ,n = 3; ( 0.14%) | 01:01   |
| Dahamsheh Z et al (2011)         | Jordan, South Jordan                  |       | 2220                      | ARA                      | n= 8; 0.36%     |                   | 1,185; n = 4; (0.34%) | 1035; n = 4; (0.39%)  | 1:1.14  |
| Abdel-Tawab et al (2004)         | Egypt, Mokasa village southern Egypt  | Rural | 5208, respondents = 5120  | ARA                      | n= 15; (0.29%:) | 48.6 +/- 17 years | 2558; n = 3; (0.12%)  | 2562; n= 12; (0.47%)  | 1:4     |
| Forghanizadeh J et al (1995)     | Iran, Fasham-Shemiranat               |       | 2502                      | ACR                      | 0.32%           |                   |                       |                       |         |
| <b>EUROPE</b>                    |                                       |       |                           |                          |                 |                   |                       |                       |         |

|                             |                                               |               |                                                                              |      |                  |                       |                      |                        |         |
|-----------------------------|-----------------------------------------------|---------------|------------------------------------------------------------------------------|------|------------------|-----------------------|----------------------|------------------------|---------|
| Cakir N et al (2012)        | Turkey, Havsa                                 | Rural & Urban | 12461                                                                        | ARA  | n = 40; (0.32%)  | 37.1+/- 21.1 years    | 6040; n = 9; (0.15%) | 6445; n = 31; (0.48%)  | 1.3.2   |
| Capkin E et al (2010)       | Turkey                                        | Urban         | 6103                                                                         | ACR  | n =59; (0.97%)   | 49.5 +/- 13.8 years   | 3080; n =11; (0.35%) | 3023; n = 48; (1.59% ) |         |
| Damjanovic V et al (2009)   | Herzegovina                                   | Urban & Rural | 28715 from Mostar, 10363 from Siroki Brijeg, 4933 from Stolac and 6676 Grude | ACR  | 0.46%            |                       |                      |                        | 01:06   |
| Adomaviciute D et al (2008) | Lithuania, Vilnius & Kaunas                   | Urban         | 2101 in Vilnius & 2143 in Kaunas; 4244                                       | ACR  | n = 39; (0.92% ) |                       | 1083; n = 0; (0%)    | 3161; n = 39; (1.23%)  |         |
| Kacar C et al (2005)        | Turkey, Antalya                               | Urban         | 3173                                                                         | 1987 | n =12; (0.38% )  | 49.92 +/- 11.56 years | 1529; n =1; (0.06%)  | 1644, n =11; ( 0.67%)  | 1:10.29 |
| Akar et al (2004)           | Turkey, Izmir (Balcova & Narlidere districts) | Urban         | 2887; 98.2% response rate (2835)                                             | ACR  | n =14 (0.49% )   | 53.0 (+/- 12.4) years | 1284; n= 2; (0.15% ) | 1551; n= 12; (0.77%)   | 1:4.81  |

|                                 |                                           |       |        |      |                  |                |                        |                         |        |         |
|---------------------------------|-------------------------------------------|-------|--------|------|------------------|----------------|------------------------|-------------------------|--------|---------|
| Boyer GS et al (1998)           | Siberian Eskimo                           | Rural | 320    | 1987 | 1.53%            |                | 134; n= 0; ( 0%)       | 192; n =5; ( 2.60%)     | 1:4.06 |         |
|                                 | Chuckchi of Chukotka Penninsula in Russia |       | 405    |      | 0.49%            |                | n= 156 1 case 0.64 %   | n= 249 1 case 0.40%     |        |         |
|                                 | North Slope Borough Inupiat               |       | 1651   |      | 1.39%            |                | 855 5; cases 0.58%     | n = 796 18 cases 2.26   |        | 1:1.39  |
|                                 | Bristold Bay Yupik Eskimo of Alaska       |       | 2135   |      | 0.56%            |                | n = 1076; 1 case 0.09% | n= 1059, 11 cases 1.04% |        | 1:11.20 |
| Erdes Sh et al (1999)           | Siberia, eastern Chutkotka                | Rural | 974    |      | n =7; (0.71%)    |                |                        |                         |        |         |
| <b>AMERICAS</b>                 |                                           |       |        |      |                  |                |                        |                         |        |         |
| Rodrigeuz-Amado J et It (2011)  | Mexico; Nuevo Leon                        | Urban | 4102   | ACR  | 0.40%            | 43.6           | 2074                   | 2639                    |        |         |
|                                 |                                           | Rural | 611    |      | 0.10%            |                |                        |                         |        |         |
| Alvarez-Nemegyei J et al (2011) | Mexico, Yucatan                           | Urban | 1787   | ACR  | n = 110 ( 2.8% ) | 42.7 +/- 17.1  | 1493                   | 2422                    |        |         |
|                                 |                                           | Rural | 2128   |      |                  |                |                        |                         |        |         |
| Senna ER et al (2004)           | Brazil; Montes Claros                     | Urban | 3038   | ACR  | n =14; (0.46% )  | 53.4 (SD 13.9) | 1109; n=1 ( 0.09%)     | 1929, n =13 ( 0.67%)    | 1:.75  |         |
| Pelaez-Ballestas I et al (2011) | Mexico: 5 regions                         | Urban | 19,213 |      | 1.60%            |                |                        | 11602                   |        |         |

|                            |                                  |               |                                    |     |                |                  |                    |                      |        |
|----------------------------|----------------------------------|---------------|------------------------------------|-----|----------------|------------------|--------------------|----------------------|--------|
| Scublinsky D et al (2010)  | Argentina, Buenos Aires province | Urban         | 3742                               | ARA | 0.48%          |                  | 0.40%              | 1.54%                |        |
| Alvarez Nemegyei J (2005)  | Mexico, Southern part (Yucatan)  | Urban & Rural | 761                                | ACR | n =36 (4.73%)  | 71 (range 46-91) | 369; n =8; (2.17%) | 392; n =28; (7.14%)  | 1:3.23 |
| Obregon Ponce et al 2012   | San Juan Sacatepequez county     | Rural         | 2000                               | ACR | 0.85%          | 35               |                    |                      |        |
|                            | Guatemala city                   | Urban         | 2000                               |     | 0.53%          | 36               |                    |                      |        |
| Reyes-Llerena et al (2009) | Cuba, Havana City                | Urban         | 3155                               | ACR | 1.24%          | 47.9 ( SD 18.1)  | 1238, n =6; (0.4%) | 1917; n = 33; (1.7%) |        |
| <b>WESTERN PACIFIC</b>     |                                  |               |                                    |     |                |                  |                    |                      |        |
| Minh Hoa TT et al (2003)   | Vietnam                          | Urban         | 2119; 94.4% response rate          | ACR | 0.47%          |                  |                    |                      |        |
| Dans LF et al (1997)       | Phillippines, Manila             | Urban         | 3065; response rate of 98%; (3006) | ACR | 0.17%          |                  |                    |                      |        |
| Wigley R (1991)            | Phillippines                     | Rural         | 950                                | ACR | n = 2; (0.21%) |                  |                    |                      |        |

|                       |                  |               |                           |     |                 |               |                       |                       |        |
|-----------------------|------------------|---------------|---------------------------|-----|-----------------|---------------|-----------------------|-----------------------|--------|
| Ye ZZ et al (2006)    | China, Guangdong | Urban & Rural | 6684; respondents=5922    | ARA | n =26; 0.44%    | 55            | 2659                  | 3262                  |        |
| Jiang BF et al (1999) | China, Shandong  |               | 17044; respondents =13386 |     | n =118; 0.88%   | 55            | 6548; n = 29; (0.44%) | 6838; n= 89; (1.30%)  | 1:2.95 |
| Zengh XG et al (2007) | China, Guangxi   | Urban & Rural | 14233                     | ARA | n = 39; (0.27%) | 53            | 7497; n= 10; (0.13%)  | 6736 ;n= 29; (0.43%)  | 1:3.08 |
| Zhang HK et al (1998) | China, Shangdong | Rural         | 5820; respondents = 5055  | ARA | n= 18; (0.36%)  | 53            | 2695; n= 4; (0.15%)   | 2360; n =14; (0.59%)  | 1:3.93 |
| Zhang NZ et al (1995) | China, Beijing   | Rural         | 4192; (18 & older)        | ARA | n =16; (0.34%)  | 54            | 2090; n =1; (0.05%)   | 2102; n=15; (0.71%)   | 1:14.2 |
|                       | China, Guangdong |               | 5057; (18 & older)        |     | n=16; (0.32%)   |               | 2384; n=1; (0.04%)    | 2673; n=15; (0.56%)   | 1:14   |
| Lin L (2007)          | China, Guangdong | Rural         | 2350                      | ACR | n=5; (0.21%)    | 46.6 +/- 15.9 | 1144; n =2; (0.17%)   | 1266; n=3; (0.25%)    | 1:1.47 |
| Shi F et al (2003)    | China, Shanghai  | Urban         | 5040; (15 & older)        | ARA | 39; (0.77 %)    | #             |                       |                       |        |
|                       |                  | Rural         | 2558; (15 & older)        |     | 11; (0.43%)     |               |                       |                       |        |
| Dai SM et al (2000)   | China; Shanghai  | Urban         | 6584                      | ARA | 31; (0.47%)     | 53            | 3190; n= 7; (0.22%)   | 3394; n = 24; (0.71%) | 1:3.22 |
| Zau JM et al (2010)   | China, Shanxi    | Urban         | 3915                      | ARA | n=11; 0.28%     |               | 1858; n=1; (0.05%)    | 2057; n =10; (0.49%)  | 1:9.8  |



|                       |                              |               |                              |            |               |    |                      |                      |         |
|-----------------------|------------------------------|---------------|------------------------------|------------|---------------|----|----------------------|----------------------|---------|
| Zhang FS et al (1991) | China, Heilongjiang          | Rural         | 2311; (18 & older)           | ARA        | n=12; (0.52%) | 54 | 1224; n = 2, (0.16%) | 1087; n =10; (0.92%) | 1:5.75  |
| Chen SL et al (1990)  | Shanghai; China              | Urban         | 2020; (15 & older)           | ARA        | 0.20%         |    |                      |                      | 1: 1.20 |
| Chou CT et al (1994)  | Tiawan                       | Urban         | 6000; (20 & older)           | ARA        | 1.45%         |    |                      |                      | 1:0.93  |
|                       |                              | Rural         | 2998; (20 & older)           | ARA        | 0.26%         |    |                      |                      | 1:1.21  |
| Lau E et al (1993)    | Hongkong                     | Urban         | 2000; (17 & older)           | ARA        | 0.30%         |    |                      |                      |         |
| Symmons DPM (1994)    | Hong Kong                    | Urban         | 1180                         | ACR        | 0.59%         |    |                      |                      |         |
| Kuo CF et al (2012)   | Taiwan                       | Urban & Rural | nationwide;18511000 above 15 | ACR        | 0.12%         |    |                      |                      |         |
| <b>AFRICA</b>         |                              |               |                              |            |               |    |                      |                      |         |
| Silman et al (1993)   | Nigeria                      | Rural         | 127                          | ACR        | 0%            |    | 0                    | 0                    |         |
| Malemba et al (2012)  | Democratic Republic of Congo |               | 3193 (18 & older)            | ACR        | 0.90%         | 53 | 1432; n = 5; 0.35%   | 1761; n = 25; 1.42%  |         |
| Dowman et al (2012)*  | African continent            | Urban & Rural |                              | ARA & Rome | 0.42%         |    |                      |                      |         |

\* This study supersedes all other studies from the African Region
